# Supplementary material
Source: PubMed Central journal article supplement (PMC6058230)
Supplement: ba020396-suppl1.pdf [file ba020396-suppl1.pdf]

## **Methods Supplement**

### *Cell culture and drug treatment*

Human umbilical vein endothelial cells (HUVECs) and human monocytic U937 cells (ATCC, CRL-1593.2) were cultured as described<sup>1,2</sup>. HUVECs were treated with vehicle (DMSO) or each TKI at a concentration consistent with the steady-state peak plasma concentration (C<sub>max</sub>) reported in CML patients: Dasatinib (0.2 μM)<sup>3</sup>, Ponatinib (0.1 μM)<sup>4</sup>, Nilotinib (3.0 μM)<sup>5</sup>, Imatinib (4.0 μM)<sup>6</sup>, Bosutinib (0.5 μM)<sup>7</sup>.

### *Cell survival assay*

HUVECs were seeded in a 96-well plate at 1500 cells/well. After 20 hours of TKI treatment, cell survival was quantified using the CellTiter-Glo Luminescent Assay (Promega).

### *Leukocyte adhesion assay*

HUVECs cultured to 90% confluence were treated with TKIs for 20 hours and incubated for 2 hours with fluorescently labeled (Molecular Probes; Eugene, OR) U937 leukocytes as described<sup>1</sup>. Adherent cells were counted by a blinded investigator.

### *Wound healing assay*

A scratch “wound” was generated in sub confluent HUVECs with a sterile pipette tip and ECs were allowed to migrate into the wound in the presence of TKIs for 20 hours as described<sup>8</sup>. ECs in the wound were counted by a blinded investigator.

### *P100 phosphoproteomic assay*

HUVECs grown to confluence in 100 mm plates were treated with TKIs in triplicate for 3 hours. The reduced representation P100 phosphoproteomic mass spectrometry assay was performed and data processed as previously described<sup>9</sup>. The P100 assay is a “sentinel” assay that monitors a group of phosphosites known to report broadly on signaling activity in response to drugs<sup>10</sup>.

### *Statistical data analysis of P100 data*

Morpheus (<https://software.broadinstitute.org/morpheus>) was used to perform marker selection<sup>11</sup> to identify phosphosites that differentiated the toxic (dasatinib, ponatinib, nilotinib) from the non-toxic (imatinib) TKIs with  $p < 0.05$  and false discovery rate  $q < 0.25$  (metric: signal-to-noise; permutations: 1000). A similarity matrix was computed using the 11 selected phosphosites (Pearson correlation). The diagonal (identity) was discarded and replicate comparisons were averaged to compute aggregate similarity within or across drugs.

## References:

1. Barrett Mueller K, Lu Q, Mohammad NN, et al. Estrogen receptor inhibits mineralocorticoid receptor transcriptional regulatory function. *Endocrinology*. 2014;155(11):4461-4472.
2. Tang D, Park HJ, Georgescu SP, Sebti SM, Hamilton AD, Galper JB. Simvastatin potentiates tumor necrosis factor alpha-mediated apoptosis of human vascular endothelial cells via the inhibition of the geranylgeranylation of RhoA. *Life Sci*. 2006;79(15):1484-1492.
3. Futosi K, Németh T, Pick R, Vántus T, Walzog B, Mócsai A. Dasatinib inhibits proinflammatory functions of mature human neutrophils. *Blood*. 2012;119(21):4981-4991.
4. Cortes JE, Kantarjian H, Shah NP, et al. Ponatinib in refractory Philadelphia chromosome-positive leukemias. *N Engl J Med*. 2012;367(22):2075-2088.
5. Fava C, Kantarjian H, Cortes J, Jabbour E. Development and targeted use of nilotinib in chronic myeloid leukemia. *Drug Des Devel Ther*. 2009;2:233-243.
6. Larson RA, Druker BJ, Guilhot F, et al. Imatinib pharmacokinetics and its correlation with response and safety in chronic-phase chronic myeloid leukemia: a subanalysis of the IRIS study. *Blood*. 2008;111(8):4022-4028.
7. Abbas R, Hsyu PH. Clinical Pharmacokinetics and Pharmacodynamics of Bosutinib. *Clin Pharmacokinet*. 2016;55(10):1191-1204.
8. Lu Q, Schnitzler GR, Ueda K, et al. ER Alpha Rapid Signaling Is Required for Estrogen Induced Proliferation and Migration of Vascular Endothelial Cells. *PLoS One*. 2016;11(4):e0152807.
9. Litichevskiy L, Peckner R, Abelin JG, et al. A Library of Phosphoproteomic and Chromatin Signatures for Characterizing Cellular Responses to Drug Perturbations. *Cell Syst*. 2018;6(4):424-443.e427.
10. Abelin JG, Patel J, Lu X, et al. Reduced-representation Phosphosignatures Measured by Quantitative Targeted MS Capture Cellular States and Enable Large-scale Comparison of Drug-induced Phenotypes. *Mol Cell Proteomics*. 2016;15(5):1622-1641.
11. Gould J, Getz G, Monti S, Reich M, Mesirov JP. Comparative gene marker selection suite. *Bioinformatics*. 2006;22(15):1924-1925.
